# Supplementary material for: Assessment of population genetic structure in the arbovirus vector midge, Culicoides brevitarsis (Diptera: Ceratopogonidae), using multi-locus DNA microsatellites
Source: Vet Res. 2015 Sep 25;46:108. doi: 10.1186/s13567-015-0250-8 (PMC4582633; doi:10.1186/s13567-015-0250-8)
Supplement: Additional file 2: — C. brevitarsis primer optimization. A subset of 38 primers was used to amplify 10 individuals. Twelve of these primer pairs PCR amplified 100% of the individuals. The remainders amplified inconsistently and were not used further. (XLS 28 kb) [file 13567_2015_250_MOESM2_ESM.xls]

## Sheet: Sheet1
LOCUS	MOTIF TYPE	PDT. SIZE	% Amplified
IE34M9106HBNAL	(AC)^12	166	20
IE34M9106HA45Z	(AC)^12	168	10
IE34M9106G02AH	(GT)^13	186	100
IE34M9106HIHRG	(GT)^10	187	0
IE34M9106HGC0D	(AC)^12	207	20
IE34M9106G7B17	(CA)^11	210	100
IE34M9106G3UGJ	(GT)^12	214	0
IE34M9106G4WIX	(GT)^11	215	20
IE34M9106GU21Z	(GT)^14	215	100
IE34M9106G16Z9	(GT)^16	225	0
IE34M9106GUWNC	(GT)11	260	0
IE34M9106G0ZCJ	(GT)^10	262	20
IE34M9106HACAV	(GT)^9	264	100
IE34M9106GU6HJ	(GA)^10	280	100
IE34M9106G8CZV	(CA)^9	287	50
IE34M9106HG3Q0	(AC)^12	292	0
IE34M9106HB6QD	(GT)^10	311	100
IE34M9106HIIUN	(GT)^12	320	100
IE34M9106HNBZE	(CA)^9	339	100
IE34M9106HI92R	(GT)^10	357	0
IE34M9106G4ELP	(AC)^11	360	10
IE34M9106HIVZL	(AC)^10	367	20
IE34M9106G0034	(GT)^10	379	20
IE34M9106HM2VX	(GT)^9	380	20
IE34M9106G9WRZ	(GT)^8	409	100
IE34M9106G5L7G	(AC)^9	412	100
IE34M9106G0XCN	(GT)^14	419	20
IE34M9106HH82P	(AC)^13	429	100
IE34M9106G088L	(GAT)^8	490	50
IE34M9106G0NNE	(CGG)^8	511	100
IE34M9106G1FMO	(AC)^11	477	100
IE34M9106G1GGN	(CT)^10	445	20
IE34M9106G1X5M	(GT)^8	344	0
IE34M9106G2H19	(AC)^10	417	20
IE34M9106G2QC6	(ACC)^9	433	0
IE34M9106GOAQO	(AC)^20	367	30
IE34M9106G1BMT	(AC)^9	400	20
IE34M9106HIHRG	(AC)^9	500	20
