# Supplementary material for: Assessment of population genetic structure in the arbovirus vector midge, Culicoides brevitarsis (Diptera: Ceratopogonidae), using multi-locus DNA microsatellites
Source: Vet Res. 2015 Sep 25;46:108. doi: 10.1186/s13567-015-0250-8 (PMC4582633; doi:10.1186/s13567-015-0250-8)
Supplement: Additional file 3: — Summary of allelic variation in 11 microsatellite loci. Allelic variation among N = 141 [Timor-Leste (N = 24), Papua New Guinea (N = 24), Queensland (N = 8), Northern Territory (N = 40) and New South Wales (N = 45)] C. brevitarsis specimens sampled from regional populations. Nallele- Null allele, m - monomorphic locus, observed (Ho) and expected (He) heterozygosity, probability of deviation from Hardy-Weinberg Equilibrium (PHWE) and inbreeding co-efficient (FIS) as described. Significantly deviated FIS values (P < 0.05) highlighted in BOLD type. (XLS 38 kb) [file 13567_2015_250_MOESM3_ESM.xls]

## Sheet: Sheet1
Timor							PNG							QLD
	Ho	He	PHWE	FIS	Nallele	% Missing		Ho	He	PHWE	FIS	Nallele	% Missing		Ho	He	PHWE	FIS	Nallele	% Missing
HH82P	0.22	0.89	0	0.76	y	4	HH82P	0.21	0.7	0	0.71	y	0	HH82P	0.13	0.83	0	0.86	y	0
GU21Z	0.38	0.58	0	0.36	y	0	GU21Z	0.42	0.67	0	0.39	y	0	GU21Zm					n	0
HIIUN	0.58	0.74	0.38	0.21	n	0	HIIUN	0.21	0.31	0.15	0.34	n	0	HIIUN	0.25	0.83	0	0.71	y	0
HNZBE	0.54	0.74	0	0.28	y	0	HNZBE	0.38	0.6	0	0.38	y	0	HNZBE	0.63	0.68	0.9	0.09	n	0
G5L7G	0.46	0.51	0.7	0.1	n	0	G5L7G	0.29	0.52	0	0.44	n	0	G5L7G	0.25	0.59	0.01	0.59	y	0
G9WRZ	0.33	0.79	0	0.59	y	0	G9WRZ	0.23	0.71	0	0.69	y	8	G9WRZ	0.14	0.82	0	0.84	y	13
GO2AH	0.38	0.76	0	0.51	y	0	GO2AH	0.25	0.72	0	0.66	y	0	GO2AH	0.88	0.81	0.73	-0.09	n	0
HBCQDm					n	4	HBCQDm					n	0	HBCQDm					n	0
GONNE	0.4	0.77	0	0.48	y	16	GONNE	0	0.54	0	1	y	20	GONNE	0.43	0.65	0.26	0.36	n	13
G1FMO	0.42	0.79	0	0.48	y	0	G1FMO	0.04	0.67	0	0.94	y	0	G1FMO	0.29	0.75	0.01	0.64	y	13
GU6HJ	0.22	0.48	0	0.55	y	4	GU6HJ	0.38	0.4	1	0.07	n	0	GU6HJ	0.25	0.5	0.22	0.52	n	0
NT							NSW
	Ho	He	PHWE	FIS	Nallele	% Missing		Ho	He	PHWE	FIS	Nallele	% Missing
HH82P	0.18	0.79	0	0.77	y	4	HH82P	0	0.84	0	1	y	2
GU21Z	0.43	0.5	0.38	0.14	n	0	GU21Z	0.47	0.52	0.25	0.1	n	0
HIIUN	0.63	0.73	0.02	0.15	n	0	HIIUN	0.47	0.79	0	0.41	y	0
HNZBE	0.63	0.77	0.03	0.19	y	0	HNZBE	0.33	0.69	0	0.52	y	0
G5L7G	0.23	0.81	0	0.72	y	0	G5L7G	0.38	0.78	0	0.52	y	0
G9WRZ	0.08	0.71	0	0.9	y	0	G9WRZ	0.31	0.76	0	0.59	y	0
GO2AH	0.45	0.71	0	0.37	y	0	GO2AH	0.38	0.79	0	0.52	y	0
HBCQD	0.1	0.1	1	-0.03	n	0	HBCQD	0	0.04	0.01	1	y	0
GONNE	0.45	0.75	0	0.4	y	0	GONNE	0.36	0.73	0	0.51	y	0
G1FMO	0.28	0.81	0	0.66	y	0	G1FMO	0.47	0.79	0	0.41	y	0
GU6HJ	0.43	0.5	0.35	0.16	n	0	GU6HJ	0.42	0.53	0.01	0.2	n	0
